# Supplementary material for: A novel colorimetric and ratiometric fluorescent probe for targeted detection of hypochlorous acid based on HClO-mediated anthracene-hydrazone to anthracene-triazole transformation
Source: Royal Society of Chemistry journal article supplement (doi:10.1039/c9ay01234f), 2019-01-01
Supplement: c9ay01234f1.pdf [file c9ay01234f1.pdf]

## *Supporting Information*

### **A novel colorimetric and ratiometric fluorescent probe for targeting detection of hypochlorous acid based on HClO-mediated anthracene-hydrazone to anthracene-triazole transformation**

Chen Jiang<sup>a</sup>, Yuewei Yao<sup>a</sup>, Chuilian Kong<sup>a</sup>, Jiaqi Du<sup>b</sup>, Jingjing Meng<sup>\*c</sup>, Cheng Yao<sup>\*\*a</sup>

<sup>a</sup> College of Chemistry and Molecular Engineering, Nanjing Tech University, Nanjing 211816, China.

<sup>b</sup> College of Chemical Engineering, Nanjing Tech University, Nanjing 211816 (China)

<sup>c</sup> College of Biotechnology and Pharmaceutical Engineering, Nanjing Tech University, Nanjing 211816 (China)

\*Corresponding author: C. Yao, E-mail: [yaochengnjut@126.com](mailto:yaochengnjut@126.com)

\*\*Corresponding author: J. J. Meng, E-mail: [jjmeng@njtech.edu.cn](mailto:jjmeng@njtech.edu.cn)

**Fig. S1** <sup>1</sup>H NMR of probe **B-CIO**;

**Fig. S2** <sup>13</sup>C NMR of probe **B-CIO**;

**Fig. S3** MS of probe **B-CIO**;

**Fig. S4** Fluorescent spectra of compound **C-CIO** (a) and probe **B-CIO** (b) in DMF/H<sub>2</sub>O (v/v) mixtures with different water fraction ( $f_w$ ) at  $\lambda_{ex} = 336$  nm.

**Fig. S5** <sup>1</sup>H NMR (400 MHz) spectra of **B-CIO** (black) in DMSO-*d*<sub>6</sub> and **C-CIO** (red) in CDCl<sub>3</sub>;

**Fig. S6** MS of probe **C-CIO**;

**Fig. S7** Plot of the fluorescence intensity at  $F_{434\text{ nm}}/F_{570\text{ nm}}$  against NaClO concentrations.

**Table S1** Parameter of probe **B-CIO** and compound **C-CIO** of B3LYP /6-311+G (d, p)

**Fig. S1**

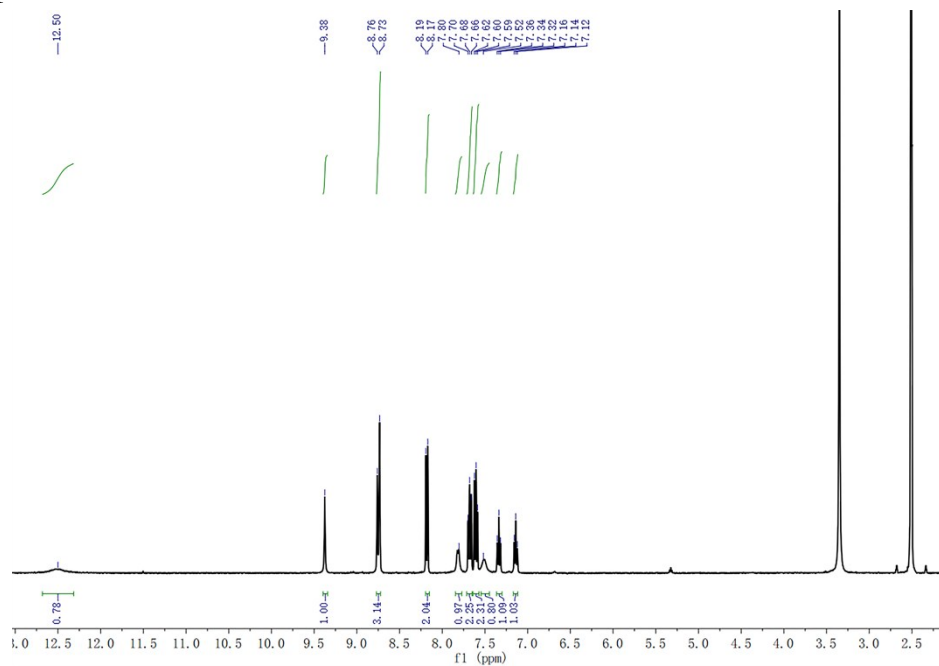

**Fig. S1**  $^1\text{H}$  NMR of probe **B-C10** in  $\text{DMSO-}d_6$ ;

**Fig. S2**

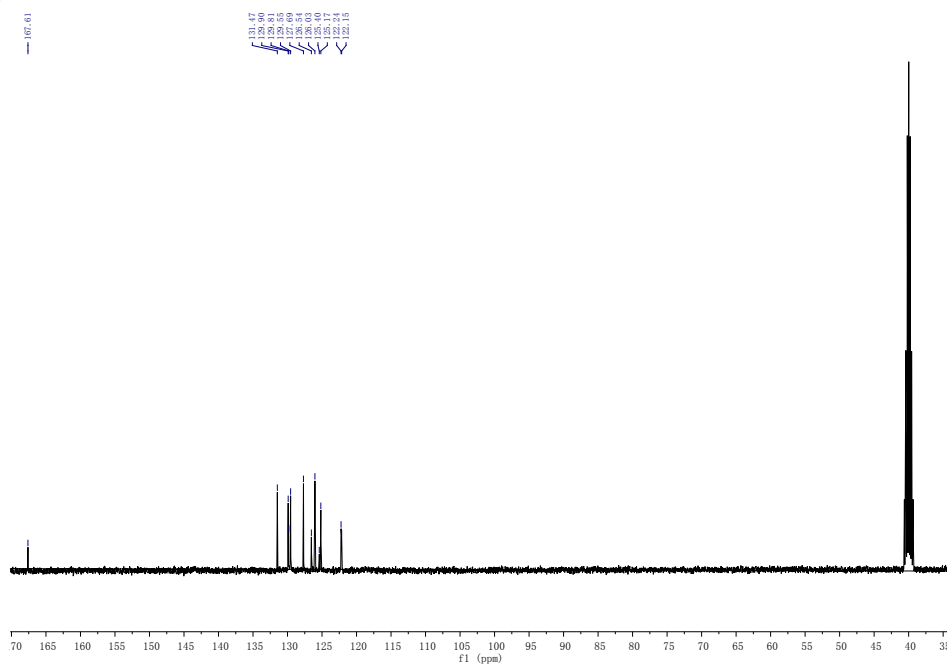

**Fig. S2**  $^{13}\text{C}$  NMR of probe **B-C10** in  $\text{DMSO-}d_6$ ;

**Fig. S3**

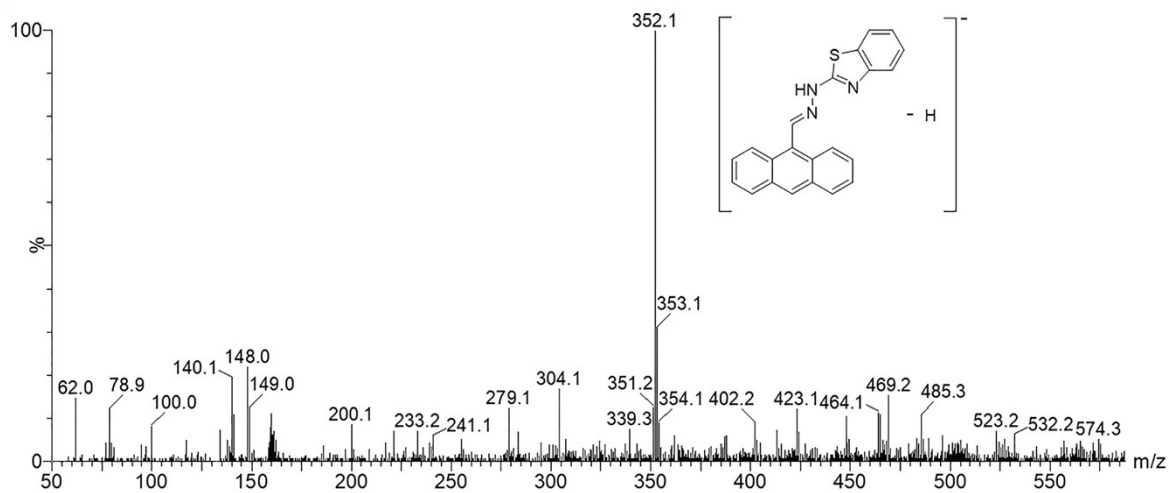

**Fig. S3 MS of probe B-C10;**

**Fig. S4**  
**(a)**

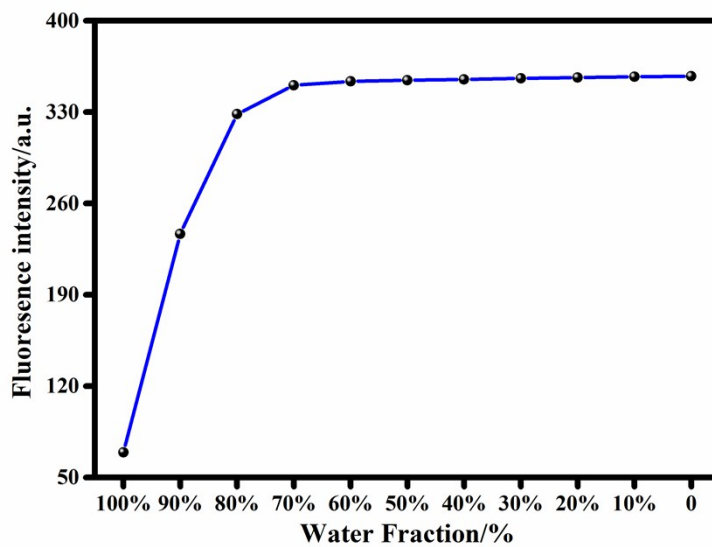

(b)

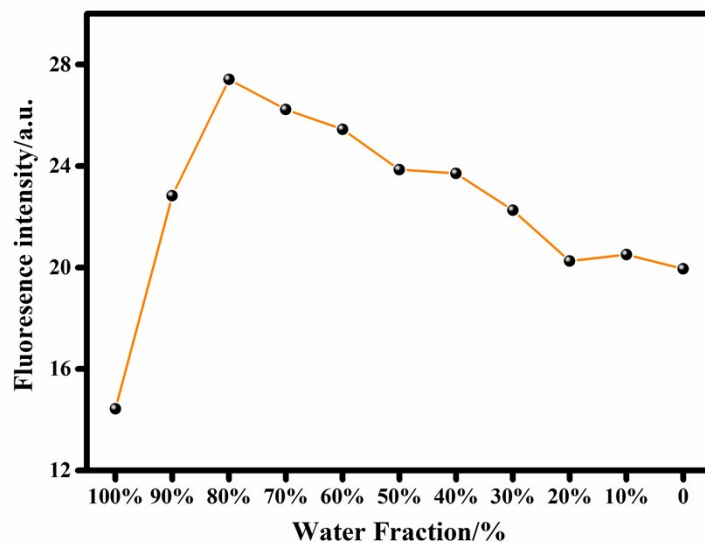

**Fig. S4** Fluorescent spectra of compound **C-CIO** (a) and probe **B-CIO** (b) in DMF/H<sub>2</sub>O (v/v) mixtures with different water fraction ( $f_w$ ) at  $\lambda_{ex} = 336$  nm.

**Fig. S5**

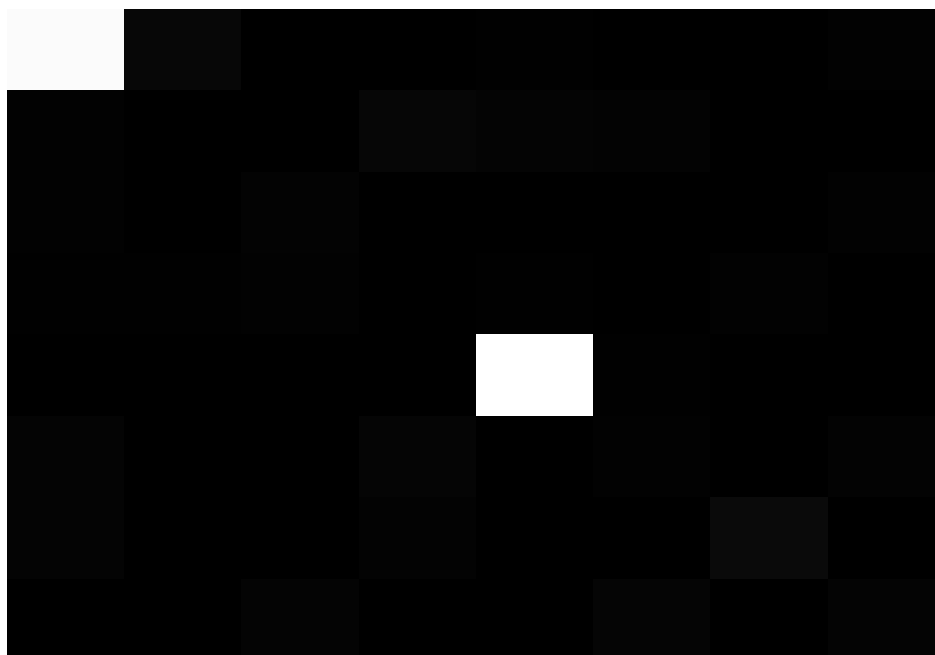

**Fig. S5** <sup>1</sup>H NMR (400 MHz) spectra of **B-CIO** (black) in DMSO-*d*<sub>6</sub> and **C-CIO** (red) in CDCl<sub>3</sub>;

Fig. S6

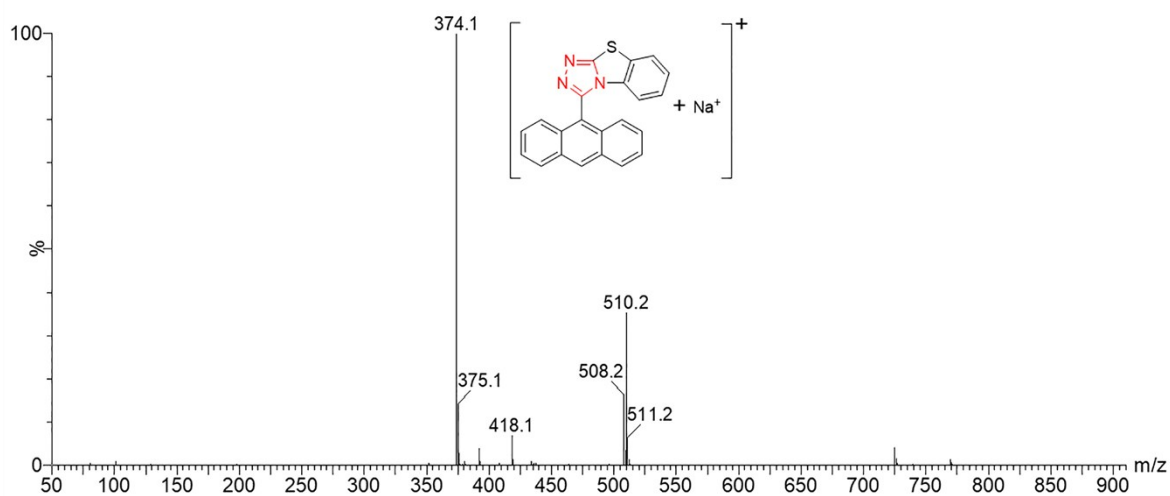

Fig. S6 MS of probe C-ClO;

Fig. S7

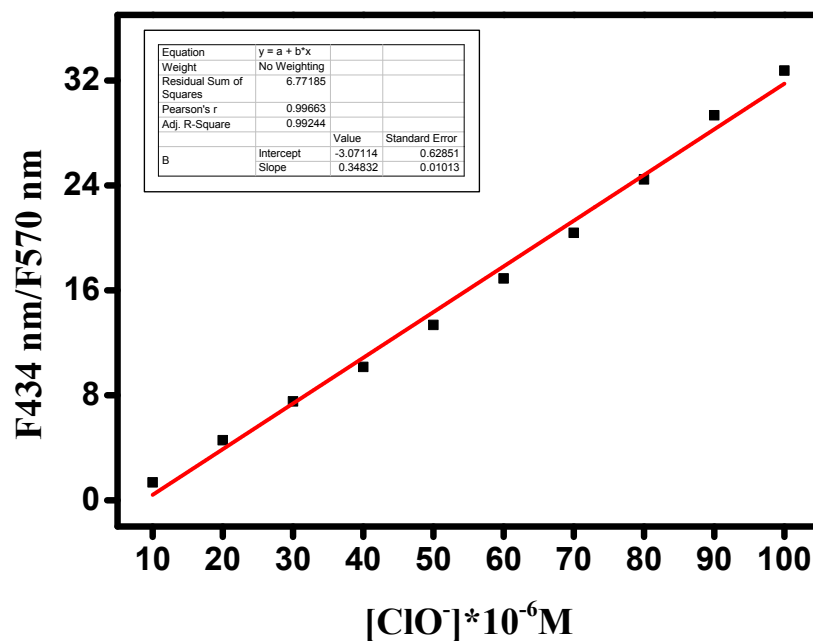

Fig. S7 Plot of the fluorescence intensity at  $F_{434 \text{ nm}}/F_{570 \text{ nm}}$  against NaClO concentrations.

**Table S1**

|             | electronic transitions | DFT//B3LYP/6-311+G(d,p) |                |          |             |          |
|-------------|------------------------|-------------------------|----------------|----------|-------------|----------|
|             |                        | excitation energy (eV)  | $\lambda$ (nm) | f        | composition | CI       |
| Probe       | S0→S1                  | 2.7876 eV               | 444.77 nm      | f=0.3441 | HOMO→LUMO   | 0.70290  |
|             | S0→S2                  | 3.4659 eV               | 357.72 nm      | f=0.0177 | HOMO-1→LUMO | 0.65415  |
|             |                        |                         |                |          | HOMO→LUMO+1 | 0.25035  |
|             | S0→S3                  | 3.6636 eV               | 338.43 nm      | f=0.1155 | HOMO-3→LUMO | -0.31440 |
|             |                        |                         |                |          | HOMO-1→LUMO | -0.21772 |
|             |                        |                         |                |          | HOMO→LUMO+1 | 0.51988  |
|             |                        |                         |                |          | HOMO→LUMO+3 | 0.26849  |
|             | S0→S4                  | 3.6926 eV               | 335.76 nm      | f=0.0790 | HOMO-3→LUMO | 0.41682  |
|             |                        |                         |                |          | HOMO-1→LUMO | -0.12611 |
|             |                        |                         |                |          | HOMO→LUMO+1 | 0.38910  |
| HOMO→LUMO+3 |                        |                         |                |          | -0.37893    |          |

(a)

|                        | electronic transitions | DFT//B3LYP/6-311+G(d,p) |                |          |             |          |
|------------------------|------------------------|-------------------------|----------------|----------|-------------|----------|
|                        |                        | excitation energy (eV)  | $\lambda$ (nm) | f        | composition | CI       |
| Probe+C1O <sup>-</sup> | S0→S1                  | 3.0643 eV               | 404.61 nm      | f=0.1073 | HOMO→LUMO   | 0.69962  |
|                        | S0→S2                  | 3.5654 eV               | 347.74 nm      | f=0.0023 | HOMO-1→LUMO | 0.70161  |
|                        | S0→S3                  | 3.7783 eV               | 328.15 nm      | f=0.0020 | HOMO-2→LUMO | 0.49106  |
|                        |                        |                         |                |          | HOMO→LUMO+1 | -0.25917 |
|                        |                        |                         |                |          | HOMO→LUMO+2 | 0.15862  |
|                        |                        |                         |                |          | HOMO→LUMO+3 | 0.40246  |
|                        | S0→S4                  | 3.9105 eV               | 317.05 nm      | f=0.0078 | HOMO-2→LUMO | 0.14548  |
|                        |                        |                         |                |          | HOMO→LUMO+1 | 0.64719  |
|                        |                        |                         |                |          | HOMO→LUMO+2 | 0.13785  |
|                        |                        |                         |                |          | HOMO→LUMO+3 | 0.18462  |

(b)

**Table S1** Selected electronic excitation energies (eV) and oscillator strengths (f), configurations of the low-lying excited states of (a) the probe **B-C1O** and (b) the compound **C-C1O**
